---

Health Service Research

## Time and feasibility of prevention in primary care

Sophie Bucher<sup>1,2</sup>, Arnaud Maury<sup>3</sup>, Julie Rosso<sup>3</sup>, Nicolas de Chanaud<sup>3</sup>,  
Géraldine Bloy<sup>4</sup>, Isabelle Pendola-Luchel<sup>2</sup>, Raphaëlle Delpech<sup>2</sup>,  
Sylvain Paquet<sup>2</sup>, Hector Falcoff<sup>3</sup>, Virginie Ringa<sup>1</sup> and Laurent Rigal<sup>1,2</sup>

<sup>1</sup>INSERM, CESP Centre for Research in Epidemiology and Population Health, U1018, Gender, Sexual and Reproductive Health Team, University of Paris-Sud, Le Kremlin-Bicêtre, France, <sup>2</sup>General Practice Department, Paris-Sud Faculty of Medicine, University of Paris-Sud, Le Kremlin-Bicêtre, France, <sup>3</sup>Department of general practice, Sorbonne Paris Cité, Paris Descartes University, Paris, France and <sup>4</sup>LEDi, Université de Bourgogne, UMR Cnrs 6307 Inserm 1200, Dijon, France.

\*Correspondence to Sophie Bucher, General Practice Department, Paris-Sud Faculty of Medicine, University of Paris-Sud, 63 rue Gabriel Peri, 94275 Le Kremlin-Bicetre Cedex, France; Email: [sophie.bucher@u-psud.fr](mailto:sophie.bucher@u-psud.fr)

### Abstract

**Background.** Prevention is an essential task in primary care. According to primary care physicians (PCPs), lack of time is one of the principal obstacles to its performance.

**Objective.** To assess the feasibility of prevention in terms of time by estimating the time necessary to perform all of the preventive care recommended, separately from the PCPs and patient's perspectives, and to compare them to the amount of time available.

**Methods.** A review of the literature identified the prevention procedures recommended in France, the duration of each procedure and its recommended frequency, as well as PCPs' consultation time. A hypothetical patient panel size of 1000 patients, representative of the French population, served as the basis for our calculations of the annual time necessary for prevention for a PCP. The prevention time from the patient's perspective was estimated from data collected from a previous study of a panel of 3556 patients.

**Results.** For PCPs, the annual time necessary for all of the required preventive care was 250 hours, or 20% of their total patient time. For a patient, the annual time required for prevention during encounters with a PCP ranged from 9.7 to 26.4 minutes per year. The mean total encounter time was 75.9 minutes per year. Nearly 73% of patients had a prevention-to-care time ratio exceeding 15%.

**Conclusion.** Feasibility thus differs substantially between patients. These differences correspond especially to disparities in the annual care time used by each patient. Specific solutions should be developed according to the patients' utilization of care.

**Key words:** General practice, guidelines, prevention.

---

### Introduction

Dispensing preventive care is an important task of the health care system, one assigned principally to primary care physicians (PCPs)—in France, GPs (1). Even though these PCPs report a high level of investment in this assignment, the proportion of the recommended preventive care actually performed remains low (2). They report a lack of time as the principal explanation of their difficulty in providing prevention (3,4).

To our knowledge, only one study has focused specifically on estimating the prevention workload of PCPs. It estimated that a specific group of US PCPs—family practitioners—would have to spend 7.4 hours a day on prevention to provide their patients with all of the recommended care (3). It thus demonstrated that the prevention burden does not fit into PCPs' actual working time. This US survey nonetheless presents two limitations. First, in terms of

generalizability, the number of guidelines for prevention and the tasks allocated to PCPs differ from country to country. There are fewer guidelines in France, for example, than in the USA (5). Second, this study analyzed the issue of allocation of time during encounters only from the PCPs' point of view: do PCPs have enough time to provide all of the recommended preventive care to their patients? It did not examine the issue from the patients' perspective: do patients see their PCPs often enough to be able to receive all of the preventive care recommended? Preventive needs, however, as well as the time PCPs and patients spend together during encounters, that is, their encounter time, vary according to the patient. It has been shown that the patients who see their PCPs most frequently receive the most preventive care (6). The fit between the time spent with each individual patient and the time necessary to meet that person's preventive needs may be good for some but not for others.

Our global objective was to study the feasibility in terms of time of performing the recommended preventive care, that is, whether PCPs have the consultation time necessary to do all of the preventive care recommended in France. More specifically, our objective was to analyze this question of availability from the separate perspectives of PCPs and of patients. Despite careful searching, we have found no study reporting such an estimate from the patients' point of view.

## Methods

An analysis of the literature allowed us to obtain the data required to calculate the time necessary to execute all of the recommended preventive procedures (that is, the duration and frequency of each).

### Review and analysis of the preventive procedures

An examination of all the guidelines issued through the end of 2014 by the various French health authorities (National Authority for Health, National Institute of Prevention and Health Education, the National Institute of Public Health Surveillance and the French National Cancer Institute) enabled us to select the preventive procedures recommended for individuals age 16 years or older, defined as all of the medical procedures intended to prevent the onset of or to screen for a disease.

These guidelines not only specify preventive procedures, but rank the grade of the recommendation (that is, the level of evidence supporting it), and characterize the eligible population according to sex and age.

Some preventive procedures are to be performed in different versions, according to the patients' characteristics. For smoking prevention, for example, we took into account that after the initial screening question ('Do you smoke?'), the rest of the procedure would differ depending on the patient's response. If the patient's answer was no, the goal of this particular procedure had been (insofar as the objective of non-smoking was already met). If the response was positive, however, the procedure should continue with at least a 'brief intervention', as recommended (7). The time required for this procedure thus differs according to the patient's smoking status. The proportion of individuals (from the eligible population) [p] who should receive each version of the procedure was estimated from epidemiologic data. As the prevalence of smoking in France is around 30% (8), 30% of the patients (the smokers) would have the 'screening + brief intervention' version of the procedure and 70% (the non-smokers) the screening version only.

The French guidelines frequently specified the annual frequency [f] of each preventive procedure, but provided its duration [t] less often. When this information was not available, review of guidelines from Britain (National Institute for Health and Care Excellent),

the USA (US Preventive Services Task Force), Australia (the Royal Australian College of General Practitioners) and Canada sometimes found it. In the absence of data from the English-speaking literature, we used a nominal group technique to make our own estimates (9).

### Prevention time for a PCP

The estimation of the time a PCP should spend on prevention annually (Table 1), that is, the time necessary to perform all of the preventive procedures recommended for a patient panel, depended on the hypotheses about panels. In this analysis, each PCP had a theoretical panel of 1000 patients older than 16 years, and they were representative of the French population (10) (Institut national de la statistique et des études économiques). In France, all individuals older than 16 years must report a PCP to the National Health Insurance Fund (or be penalized by reduced reimbursements). On average, each French PCP has a panel list of slightly fewer than 1000 patients. Rounding to 1000 facilitated the comparisons.

This theoretical patient panel made it possible to determine the number of people requiring each procedure [n]. Multiplying the eligible population of 1000 by the proportion of individuals concerned [p] showed the number of patients concerned by each version of each type of preventive procedure [n.p]. The time necessary each year to perform a given version of one preventive procedure for the entire theoretical patient panel was calculated by multiplying the number of people concerned by that version [n p] by the time required to perform it [t] and its annual frequency [f]. The annual time a PCPs should spend on prevention was defined as the sum of the time calculated above for every version of every type of preventive procedure  $[\sum_{\text{preventive procedures}} (\sum_{\text{versions}} (n.p.f.t))]$ .

### Encounter time for a PCP

This time is defined as the annual time a PCP spent in encounters with patients (Table 1). In 2009, GPs in France reported spending a mean of 6.6 hours per day with patients (11). On a basis of a work year of 46 weeks, 5 days a week, a PCP would spend 1518 hours per year with patients.

Given that PCPs available encounter time is shared by patients aged 16 years or older (who comprise their theoretical patient panel) as well as patients younger than 16 years (who account for 19.8% of the French population; because they are not required to choose a PCP, they are not included in these panels), PCPs' annual encounter time spent with these adults (those aged 16 or older) was estimated at 1267 hours per year (=1518/1198).

The study of the feasibility of prevention in terms of time (that is, whether the PCP had available the encounter time required for all of the recommended preventive care) compared the prevention time, that is, the time necessary to perform the care, with the encounter time, that is, the time available to do so. The percentage of the encounter time that should be allotted for prevention (that is, the ratio of the prevention and encounter times) was calculated.

An analysis from the patient's perspective followed that from the point of view of a PCP responsible for an average patient panel. Data from the sample of patients in the *Prev Quanti* study (12) allowed estimates of individual times and ratios rather than means, which mask the variability between patients. In this study, a sample of 3640 patients was constructed by randomly drawing 70 patients (35 men and 35 women) aged 40 to 74 years from their PCP's patient panel, furnished by the health insurance administration for each of the 52 participating PCPs.

**Table 1.** Prevention and encounter times from the separate perspectives of the primary care provider (PCP) and the patient

|                 |            | PCP's perspective                                                                                                                                                                                                                                                                                                                                                                                                                   | Patient's perspective                                                                                                                                                                                                                                                                                                                    |
|-----------------|------------|-------------------------------------------------------------------------------------------------------------------------------------------------------------------------------------------------------------------------------------------------------------------------------------------------------------------------------------------------------------------------------------------------------------------------------------|------------------------------------------------------------------------------------------------------------------------------------------------------------------------------------------------------------------------------------------------------------------------------------------------------------------------------------------|
| Prevention time | Definition | Annual time a PCP should spent on prevention to perform all of the preventive procedures recommended in France                                                                                                                                                                                                                                                                                                                      | Annual time a patient should spend with his or her PCP to undergo all of the preventive procedures recommended in France<br>Only the time during encounters is counter, not that needed for the patient's execution of the recommendation in their daily life                                                                            |
|                 | Estimate   | Calculated using the characteristics specified in the recommendations (eligible population, duration, frequency...), and considering that a PCP is responsible for a theoretical patient panel of 1000 patients aged 16 years or older, representative of the general French population<br>Limitations: the mean does not take into account differences in patient panels between PCPs, especially in terms of numbers, sex and age | Calculated as for a PCP (see the preceding column), considering this times that a PCP has a patient panel of only one patient (of the given sex and age)<br><br>Strength: takes the sex and age of each patient into account<br>Limitations: mean does not take each patient's individual real preventive needs into account             |
| Encounter time  | Definition | Annual time spent by a physician in consultation—patient encounter time                                                                                                                                                                                                                                                                                                                                                             | Annual time spent by the patient with his or her PCP                                                                                                                                                                                                                                                                                     |
|                 | Estimate   | Calculated from the mean reported working time with patients reported by PCPs (data from the literature), in considering<br>Limitations: mean not taking differences in working time between PCPs into account                                                                                                                                                                                                                      | Calculated for each patient of the random sample of the <i>Prev Quanti</i> study. This is the product of the number of patient-PCP encounter during the past year times the mean duration of the PCP's encounters<br>Strength: individual measurements of encounter time<br>Limitations: available only for patients aged 40 to 74 years |

### Prevention time for a patient

Calculation of this time for a patient of a given sex and age used the formula above, considering that a PCP's patient panel was reduced to a single patient. If the patient's sex and age considered made him or her eligible for a prevention procedure,  $n$  equaled 1 in the preceding formula, and 0 otherwise. The prevention time was thus calculated for each patient in the sample.

### Encounter time for a patient

Unlike the other estimates used in this work, which come from the literature, the estimate of the patient-PCP encounter time comes from empirical data collected in the *Prev Quanti* study. The annual patient-PCP encounter time was defined for each patient as the time spent by the patient with his or her PCP. It was obtained by multiplying two data items collected from the latter: the number of times the patient saw the PCP during the previous year and the mean duration of a consultation with that PCP. The number of patient-PCP encounters was available for 3556 patients (97.7%). The mean number of encounter was 3.58 per year for the 2922 patients who saw their PCP at least once. The 52 participating PCPs reported a mean encounter duration of 21.7 minutes.

## Results

### Review and analysis of the preventive procedures

**Table 2** presents the 23 preventive procedures selected, distributed in 37 versions (13–32). Screening for current smoking, for example, concerns all men and all women aged 16 years or older. It takes 10 seconds for non-smokers (70%) and 180 seconds for smokers (30%) and should be repeated each year.

### Prevention and encounter times for a PCP

The last column in **Table 2** presents the time necessary to perform each version of each procedure for a theoretical patient panel of 1000 patients representative of the French population. Times reported in a bold font come from the literature, those italicized were determined by analogy to a similar type of preventive care, and those in standard roman type were determined by the nominal group technique (33–50). The total time for smoking prevention was 16.94 hours per year. The overall annual prevention time exceeded 250.31 hours per year. Overall, prevention accounted for 20% of the physician's annual patient encounter time.

### Prevention and encounter times for a patient

The mean prevention time per patient was 16.2 minutes per year (SD = 3.9). No patient could have received all of their recommended preventive care in <9.7 minutes per year (**Table 3**). On the other hand, all patients could have received all of it in <26.4 minutes per year.

The mean encounter time per patient was 75.9 minutes per year. This time was  $\leq 20$  minutes per year for 27.5% of patients and exceeded 40 minutes per year for 57.3% (**Table 3**).

The prevention time (**Table 3**) ranged from 0.6% to >200% of the encounter time, depending on the patient. This great variability was due principally to the substantial variations in encounter time (ranging from 0 to >150 minutes per year, depending on the patient). Differences in prevention time were substantially smaller (around 10 to 25 minutes per year, depending on the patient).

Prevention corresponded to >15% of encounter time for 72.8% of patients. Among patients who saw their PCPs at least once during the past year, this time accounted for a mean of 31.8% of their encounter time.

**Table 2.** Preventive procedures: characteristics and annual prevention time required for a primary care physician with a theoretical patient panel of 1000 persons<sup>a</sup>

| Preventive procedure                | Grade of recommendation <sup>c</sup> | Eligible population <sup>a</sup> |                        | Number [n] | Different versions of the procedure         | Proportion of individuals eligible (%) [p] | Duration (sec) <sup>b</sup> [t] | Annual frequency <sup>b</sup> [f] | Annual prevention time required for a theoretical patient panel <sup>b</sup> (h/year) |
|-------------------------------------|--------------------------------------|----------------------------------|------------------------|------------|---------------------------------------------|--------------------------------------------|---------------------------------|-----------------------------------|---------------------------------------------------------------------------------------|
|                                     |                                      | Sex                              | Age (years)            |            |                                             |                                            |                                 |                                   |                                                                                       |
| Cardiovascular risk Factors (13,33) | B                                    | ♂ + ♀                            | >45                    | 550        | —                                           | 100                                        | 240                             | 1                                 | 36.64                                                                                 |
| Hypertension (14,34)                | A                                    | ♂ + ♀                            | >16                    | 1000       | —                                           | 100                                        | 120                             | 1                                 | 33.33                                                                                 |
| Dyslipidemia (15,35)                | A                                    | ♂ + ♀                            | 16–80                  | 936        | —                                           | 100                                        | 60                              | 0.2                               | 3.12                                                                                  |
| Type 2 diabetes mellitus (16,36)    | B                                    | ♂ + ♀                            | >45                    | 550        | —                                           | 100                                        | 60                              | 0.33                              | 3.02                                                                                  |
| Insomnia (17)                       | Unspecified                          | ♂ + ♀                            | >16                    | 1000       | Without insomnia<br>With insomnia           | 50                                         | 10                              | 1                                 | 1.39                                                                                  |
| Melanoma (18,37)                    | B                                    | ♂ + ♀                            | >16                    | 1000       | With risk factors<br>Without risk factors   | 12                                         | 240                             | 1                                 | 33.33                                                                                 |
| Drug dependence (1)                 | I                                    | ♂ + ♀                            | >16                    | 1000       | —                                           | 100                                        | 60                              | 1                                 | 14.67                                                                                 |
| Alcohol (38,39)                     | B                                    | ♂ + ♀                            | >16                    | 1000       | No excessive drinking<br>Excessive drinking | 90                                         | 30                              | 0.25                              | 1.88                                                                                  |
| Smoking (7,40)                      | A                                    | ♂ + ♀                            | >16                    | 1000       | —                                           | 10                                         | 330                             | 0.25                              | 2.29                                                                                  |
| HIV (20,41)                         | A                                    | ♂ + ♀                            | >16                    | 1000       | No smoking                                  | 70                                         | 10                              | 1                                 | 1.94                                                                                  |
| HBV and HCV (21,42)                 | B                                    | ♂ + ♀                            | >16                    | 1000       | Smoking                                     | 30                                         | 180                             | 1                                 | 15.00                                                                                 |
| Syphilis (22,43)                    | A                                    | ♂ + ♀                            | >16                    | 1000       | —                                           | 100                                        | 60                              | 1                                 | 16.67                                                                                 |
| Falls (23,37)                       | A                                    | ♂ + ♀                            | >65                    | 224        | With risk factors<br>Without risk factors   | 20                                         | 60                              | 1                                 | 3.33                                                                                  |
| Cognitive decline (24)              | I                                    | ♂ + ♀                            | >65                    | 224        | —                                           | 2                                          | 60                              | 1                                 | 0.33                                                                                  |
| Influenza vaccine (25)              | Unspecified                          | ♂ + ♀                            | >65                    | 224        | No cognitive decline<br>Cognitive decline   | 30                                         | 390                             | 1                                 | 7.29                                                                                  |
| Depression (26,44)                  | B                                    | ♂ + ♀                            | >16                    | 1000       | —                                           | 70                                         | 90                              | 1                                 | 3.93                                                                                  |
| Osteoporosis (27,45)                | B                                    | ♀                                | >50                    | 464        | Without depression<br>Depression            | 85                                         | 120                             | 0.5                               | 3.18                                                                                  |
| Cervical cancer (28,46)             | A                                    | ♀                                | 25–65                  | 335        | —                                           | 15                                         | 900                             | 0.5                               | 4.21                                                                                  |
| Pregnancy (29,40,47,48)             | A/B                                  | ♀                                | 16–49                  | 269        | —                                           | 100                                        | 10                              | 1                                 | 2.50                                                                                  |
| Colorectal cancer (30,49)           | A                                    | ♂ + ♀                            | 50–74                  | 351        | —                                           | 10                                         | 180                             | 1                                 | 5.00                                                                                  |
| Breast cancer (31,50)               | B                                    | ♀                                | 50–74                  | 182        | —                                           | 100                                        | 60                              | 0.5                               | 6.19                                                                                  |
| dTPolio vaccine (25)                | Unspecified                          | ♂ + ♀                            | 25, 45, 65, 75, 85, 95 | 62         | —                                           | 100                                        | 120                             | 1                                 | 5.52                                                                                  |
| Incontinence (32,37)                | B                                    | ♀                                | 16–30                  | 111        | Incontinence<br>No incontinence             | 12                                         | 180                             | 0.5                               | 2.92                                                                                  |
|                                     |                                      | ♀                                | 31–50                  | 167        | —                                           | 88                                         | 10                              | 0.5                               | 1.52                                                                                  |
|                                     |                                      | ♀                                | 51–70                  | 154        | Incontinence<br>No incontinence             | 31                                         | 180                             | 0.5                               | 2.07                                                                                  |
|                                     |                                      | ♀                                | >71                    | 90         | —                                           | 36                                         | 180                             | 0.5                               | 4.00                                                                                  |
| Total                               |                                      |                                  |                        |            | Incontinence<br>No incontinence             | 64                                         | 10                              | 0.5                               | 0.33                                                                                  |
|                                     |                                      |                                  |                        |            | —                                           | 20                                         | 180                             | 0.5                               | 0.14                                                                                  |
|                                     |                                      |                                  |                        |            | —                                           | 80                                         | 10                              | 0.5                               | 1.29                                                                                  |
|                                     |                                      |                                  |                        |            | —                                           | 80                                         | 10                              | 0.5                               | 0.16                                                                                  |
|                                     |                                      |                                  |                        |            | —                                           | 20                                         | 180                             | 0.5                               | 1.39                                                                                  |
|                                     |                                      |                                  |                        |            | —                                           | 20                                         | 180                             | 0.5                               | 0.14                                                                                  |
|                                     |                                      |                                  |                        |            | —                                           | 80                                         | 10                              | 0.5                               | 0.45                                                                                  |
|                                     |                                      |                                  |                        |            | —                                           | 80                                         | 10                              | 0.5                               | 0.10                                                                                  |
|                                     |                                      |                                  |                        |            | —                                           | 80                                         | 10                              | 0.5                               | 250.31                                                                                |

HBV, hepatitis B virus; HCV, hepatitis C virus; HIV, human immunodeficiency virus.

<sup>a</sup> Patient panel of 1000 persons aged 16 years or older representative of the French population.

<sup>b</sup> The figures in bold come from the literature, those italicized were determined by analogy with a similar type of preventive care, and those in normal roman type were determined by us.

<sup>c</sup> Grade of recommendation: A = there is high certainty that the net benefit is substantial; Grade B = there is moderate certainty that the net benefit is moderate to substantial; Grade C = there is low certainty that the net benefit is moderate to substantial; Grade D = there is low certainty that the net benefit is moderate to substantial; Grade E = there is low certainty that the net benefit is moderate to substantial; Grade F = there is low certainty that the net benefit is moderate to substantial; Grade G = there is low certainty that the net benefit is moderate to substantial; Grade H = there is low certainty that the net benefit is moderate to substantial; Grade I = evidence is lacking, of poor quality, or conflicting, and the balance of benefits and harms cannot be determined. If the service is offered, patients should understand the uncertainty about the balance of benefits and harms.

**Table 3.** Prevention and encounter times for a random sample of patients<sup>a</sup>

| Time (min/year) | Number of patients (%) with a prevention time less than the time mentioned in column 1                     |
|-----------------|------------------------------------------------------------------------------------------------------------|
| 9.7             | 402 (11)                                                                                                   |
| 15.3            | 1792 (50)                                                                                                  |
| 18.6            | 2978 (84)                                                                                                  |
| 26.4            | 3556 (100)                                                                                                 |
| Time (min/year) | Number of patients (%) with an encounter time less than the time mentioned in column 1                     |
| 0 <sup>b</sup>  | 634 <sup>b</sup> (17.8)                                                                                    |
| 10              | 651 (18.3)                                                                                                 |
| 15              | 700 (19.7)                                                                                                 |
| 20              | 976 (27.5)                                                                                                 |
| 30              | 1209 (34.0)                                                                                                |
| 40              | 1518 (42.7)                                                                                                |
| 50              | 1675 (47.1)                                                                                                |
| 75              | 2222 (62.7)                                                                                                |
| 100             | 2741 (77.1)                                                                                                |
| 150             | 3158 (88.8)                                                                                                |
| >150            | 3556 (100)                                                                                                 |
| Ratio (%)       | Number of patients (%) with a prevention to encounter time ratio less than the ratio mentioned in column 1 |
| 5               | 79 (2.2)                                                                                                   |
| 10              | 387 (10.9)                                                                                                 |
| 20              | 1206 (33.9)                                                                                                |
| 30              | 1868 (52.5)                                                                                                |
| 45              | 2330 (65.5)                                                                                                |
| 60              | 2532 (71.2)                                                                                                |
| 100             | 2840 (79.9)                                                                                                |
| 223             | 2922 (82.2)                                                                                                |
| +∞ <sup>b</sup> | 3556 (100)                                                                                                 |

<sup>a</sup>This sample, from the Prev Quanti study, was obtained by a random drawing of 70 patients (35 men and 35 women) aged 40 to 74 years in the patient panel of 52 general practitioners.

<sup>b</sup>Patients who have not seen a primary care physician in the past year have a care time of zero and a ratio of infinity.

## Discussion

### Principal results

The time necessary for a PCP to provide preventive care to a theoretical patient panel of 1000 people representative of the French population older than 16 years was ~250 hours per year, or ~20% of total patient encounter time.

Data for a random sample of patients aged 40 to 74 years showed that, for almost 73% of them, the time required for their recommended preventive care would account for >15% of the time they spent with their PCP. Our results show a clear discordance in the feasibility of prevention guidelines according to perspective: that of the PCP, where the workload appears acceptable, or that of the patient. For a minority of the latter, prevention managed from visit to visit appears possible, but for those with the least PCP encounter time, that appears more difficult, or even impossible.

### Strengths and limitations

Our study is the first to analyze the time required for prevention at the patient level to determine its feasibility; other analyses have concerned only the PCP's perspective. Moreover, we used empirical individual data about patient-PCP encounter time from the patient's perspective, collected in a cross-sectional observational study designed in primary care. National means from studies of mean encounter time, which mask disparities between patients, were thus avoided.

Consistent with previous studies (3), our estimates of prevention time were minimal and based on guidelines from English-speaking countries. Nonetheless, the duration of some preventive procedures

not mentioned in the literature had to be evaluated. Ideally, preventive procedures should be observed in real life to measure the time they take. To our knowledge, such estimates are not currently available, although they could be obtained, for example, from filmed office visits.

Another limitation was that our sample did not include any patients aged 16 to 39 years for whom we could estimate encounter time. To our knowledge, no representative database contains encounter times individualized at the patient level. Estimates in the *Prev Quanti* study database apply only to individuals aged 40 to 74 years. The individual prevention times were the mean times for a person of a given sex and age. The database did not let us determine the version of the procedure to be used for each prevention procedure recommended (Table 1).

An important limitation of our work is the postulate that only PCPs provide preventive services. The work of other physicians (especially cardiologists and gynecologists) has not been taken into account. In addition, some patients with chronic diseases receive preventive procedures as part of their usual chronic disease management (for example, lipid profiles and blood pressure measurements for patients with diabetes). This may diminish the preventive burden since some of it is already performed as part of chronic disease care (51).

### Comparison with other countries and generalization

Beyond the differences in guidelines between countries (4), the generalization of our results depends on variations in patient care time between countries, that is, the frequency and duration of visits in different countries. In France, the number of annual visits per

patient is close to the mean for the OECD (52). Nonetheless, this frequency differs substantially between countries and is clearly lower in Scandinavian and English-speaking countries. Moreover, the duration of visits is sometimes shorter than in France, where it averages 16 minutes (53).

### Consequence for practices

PCPs can use the table (Supplementary Excel Table 1) used for the calculations to evaluate their prevention time by modifying their practice conditions..

PCPs report devoting from 11% (in the USA (4)) to 16% (in the UK (54)) of their patient encounter time to preventive services. In France, the median proportion of the preventive consultation was 15% (55). Setting a threshold for the feasibility of implementation of prevention guidelines at 15% of each patient's time with the PCP yields three patient profiles. The first comprises those whose prevention time is <15% of their total encounter time, who can receive prevention services as part of their standard care. The second, on the contrary, do not see their PCP at all or very little and therefore cannot receive preventive care. Finally, those in intermediate situations do not see their PCP often enough to receive all of the preventive care recommended. Solutions must be developed for the latter two groups. Some authors propose focusing prevention efforts on the most effective procedures (56), to the detriment of the others (57). Prioritizing some preventive procedures (58) appears to be an interesting possibility, but few studies have examined how physicians rank preventive procedures (59). This probably does not depend only on the criterion of effectiveness but also on patients' preferences (60). Other solutions have been suggested to help PCPs resolve this challenge: use a reminder system (61), propose organizational (62) and financial incentives (63), improve public awareness of the value of prevention (64), train PCPs differently (65) and delegate preventive services (61). The annual physical check-up or periodic health examination is another possible solution (66), especially for patients who come rarely for acute or chronic disease care. In France, an office visit usually lasts ~15 minutes (58) and could therefore suffice to perform most prevention procedures; in numerous English-speaking countries, on the other hand, a single visit would probably be too short. In addition, the number of preventive procedures provided in an office visit increase quadratically with the duration of the visit (that is, they vary linearly with the square of the duration of the visit) (67). It is thus very difficult to include prevention in short visits. Nonetheless, the effectiveness of this periodic prevention visit in terms of morbidity and mortality has not been demonstrated (68); and its utility has even been challenged because its content does not correspond to guidelines (69).

### Conclusion

There are thus numerous pathways to help PCPs accomplish their preventive tasks. It is now essential to evaluate them better to guide the organizational choices that can make the preventive burden of PCPs acceptable from a time perspective.

Our results should encourage the organizations and agencies issuing recommendations to assess the consequences of their recommendations in terms of workload, by specifying the health care professionals involved and monitoring their accessibility to patients, especially those who see PCPs rarely. An interventional study could be envisioned that offers patients who consult little or not at all a consultation for preventive care alone, and to those who do not consult sufficiently, a consultation with, for example, a nurse, to complete their preventive management.

### Declaration

Funding: the authors thank the Groupement régional de santé publique d'Ile de France, Conseil régional d'Ile de France and the National Institute for Prevention and Health Education (INPES, Institut national de prévention et d'éducation pour la santé) for their financial support of the Prev Quanti Survey. Ethical approval: the study was approved by the National Data Protection Authority (CNIL, Commission nationale de l'informatique et des libertés), which is responsible for ethical issues and protection against inappropriate individual electronic data.

Disclosures: the authors declare that they have no conflict of interest.

### References

1. WONCA Europe. The European Definitions of the Key Features of the Discipline of General Practice and the Role of the General Practitioner. 2005. <http://www.woncaeurope.org/sites/default/files/documents/Definition%20EURACTshort%20version.pdf> (accessed on 31 August 2016).
2. McGlynn EA, Asch SM, Adams J *et al*. The quality of health care delivered to adults in the United States. *N Engl J Med* 2003; 348: 2635–45.
3. Yarnall KS, Pollak KI, Østbye T, Krause KM, Michener JL. Primary care: is there enough time for prevention? *Am J Public Health* 2003; 93: 635–41.
4. Rafferty M. Prevention services in primary care: taking time, setting priorities. *West J Med* 1998; 169: 269–75.
5. Gelly J, Mentre F, Nougairède M, Duval X. Preventive services recommendations for adults in primary care settings: agreement between Canada, France and the USA—a systematic review. *Prev Med* 2013; 57: 3–11.
6. Ferrante JM, Balasubramanian BA, Hudson SV, Crabtree BF. Principles of the patient-centered medical home and preventive services delivery. *Ann Fam Med* 2010; 8: 108–16.
7. Arrêt de la consommation de tabac: du dépistage individuel au maintien de l'abstinence en premier recours. Recommandations Pour La Pratique Clinique. 2014. [http://www.has-sante.fr/portail/upload/docs/application/pdf/2014-11/recommandations\\_-\\_arret\\_de\\_la\\_consommation\\_de\\_tabac\\_octobre\\_2014\\_2014-11-17\\_14-13-23\\_985.pdf](http://www.has-sante.fr/portail/upload/docs/application/pdf/2014-11/recommandations_-_arret_de_la_consommation_de_tabac_octobre_2014_2014-11-17_14-13-23_985.pdf) (accessed on 31 August 2016).
8. Le Tabagisme En France. Analyse de l'enquête Baromètre santé. 2010. <http://inpes.santepubliquefrance.fr/CFESBases/catalogue/pdf/1513.pdf> (accessed on 31 August 2016).
9. Jones J, Hunter D. Consensus methods for medical and health services research. *BMJ* 1995; 311: 376–80.
10. Institut National de la Statistique et des études économiques. <http://www.insee.fr/fr/> (accessed on 31 August 2016).
11. Le Fur P. Le temps de travail des médecins généralistes. Une synthèse des données disponibles. 2009. <http://www.irdes.fr/Publications/Qes/Qes144.pdf> (accessed on 31 August 2016).
12. Thebault JL, Falcoff H, Favre M, Noël F, Rigal L. Patient-physician agreement on tobacco and alcohol consumption: a multilevel analysis of GPs' characteristics. *BMC Health Serv Res* 2015; 15: 110.
13. Méthodes d'évaluation du risque cardiovasculaire global. ANAES. 2004. [http://www.has-sante.fr/portail/upload/docs/application/pdf/Risque\\_cardio\\_vasculaire\\_rap.pdf](http://www.has-sante.fr/portail/upload/docs/application/pdf/Risque_cardio_vasculaire_rap.pdf) (accessed on 31 August 2016).
14. Blacher J, Halimi JM, Hanon O *et al*.; Société française d'hypertension artérielle. [Management of arterial hypertension in adults: 2013 guidelines of the French Society of Arterial Hypertension]. *Presse Med* 2013; 42: 819–25.
15. Prise en charge thérapeutique du patient dyslipidémique : recommandations. AFSSAPS. 2005 [http://www.nice.cngc.fr/IMG/pdf/Dyslipidemie\\_-\\_AFSSAPS\\_2005.pdf](http://www.nice.cngc.fr/IMG/pdf/Dyslipidemie_-_AFSSAPS_2005.pdf).
16. Principes de dépistage du diabète de type 2. ANAES. 2003. [http://www.has-sante.fr/portail/upload/docs/application/pdf/diabete\\_rap\\_2003.pdf](http://www.has-sante.fr/portail/upload/docs/application/pdf/diabete_rap_2003.pdf) (accessed on 31 August 2016).
17. Prise en charge du patient adulte se plaignant d'insomnie en médecine générale. Recommandations pour la pratique clinique. France: HAS, 2006. [http://www.has-sante.fr/portail/upload/docs/application/pdf/rpc\\_sftg\\_insomnie\\_-\\_synthese\\_des\\_recommandations.pdf](http://www.has-sante.fr/portail/upload/docs/application/pdf/rpc_sftg_insomnie_-_synthese_des_recommandations.pdf) (accessed on 31 August 2016).
18. Stratégie de diagnostic précoce du mélanome. *Recommandation en santé publique*. France: HAS, 2006. <http://www.has-sante.fr/portail/upload/>

- docs/application/pdf/rapport\_strategie\_de\_diagnostic\_precoce\_du\_melano-  
nome.pdf (accessed on 31 August 2016).
19. Abus, dépendances et polyconsommations: stratégies de soins. *Recommandation de la commission d'audit*. France: HAS, 2007. [http://www.has-sante.fr/portail/upload/docs/application/pdf/reco\\_polyconsommations\\_-\\_version\\_finale\\_2007\\_12\\_21\\_21\\_47\\_28\\_78.pdf](http://www.has-sante.fr/portail/upload/docs/application/pdf/reco_polyconsommations_-_version_finale_2007_12_21_21_47_28_78.pdf) (accessed on 31 August 2016).
  20. Morlat P. *Prise en charge médicale des personnes vivant avec le VIH*. France: Rapport de recherche CNS et ANRS, 2013, pp. 476.
  21. Dhumeaux D. *Prise en charge des personnes infectées par les virus de l'hépatite B ou de l'hépatite C*. France: Rapport de recommandations. ANRS, AFEF, 2014, pp. 510. [http://social-sante.gouv.fr/IMG/pdf/Rapport\\_Prise\\_en\\_charge\\_Hepatitis\\_2014.pdf](http://social-sante.gouv.fr/IMG/pdf/Rapport_Prise_en_charge_Hepatitis_2014.pdf) (accessed on 21 August 2016).
  22. Martel P. *Évaluation a priori du dépistage de la syphilis en France*. France: Recommandations en santé publique. France: HAS, 2007, pp. 30. [http://www.has-sante.fr/portail/upload/docs/application/pdf/synthese\\_evaluation\\_a\\_priori\\_du\\_depistage\\_de\\_la\\_syphilis\\_en\\_france\\_2007\\_07\\_02\\_12\\_22\\_51\\_493.pdf](http://www.has-sante.fr/portail/upload/docs/application/pdf/synthese_evaluation_a_priori_du_depistage_de_la_syphilis_en_france_2007_07_02_12_22_51_493.pdf) (accessed on 21 August 2016).
  23. Prévention des chutes accidentelles chez la personne âgée. *Recommandations pour la pratique clinique*. France: HAS et SFDRMG, 2005. [http://www.has-sante.fr/portail/upload/docs/application/pdf/Prevention\\_chutes\\_recos.pdf](http://www.has-sante.fr/portail/upload/docs/application/pdf/Prevention_chutes_recos.pdf) (accessed on 31 August 2016).
  24. *Diagnostic et prise en charge de la maladie d'Alzheimer et des maladies apparentées Recommandations de bonne pratique*. France: HAS, 2011. [http://www.has-sante.fr/portail/upload/docs/application/pdf/2011-12/recommandation\\_maladie\\_d\\_alzheimer\\_et\\_maladies\\_apparetees\\_diagnostic\\_et\\_prsie\\_en\\_charge.pdf](http://www.has-sante.fr/portail/upload/docs/application/pdf/2011-12/recommandation_maladie_d_alzheimer_et_maladies_apparetees_diagnostic_et_prsie_en_charge.pdf) (accessed on 31 August 2016).
  25. Calendrier des vaccinations et recommandations vaccinales. 2014. [http://social-sante.gouv.fr/IMG/pdf/Calendrier\\_vaccinal\\_ministere\\_sante\\_2014.pdf](http://social-sante.gouv.fr/IMG/pdf/Calendrier_vaccinal_ministere_sante_2014.pdf) (accessed on 31 August 2016).
  26. *Prise en charge d'un épisode dépressif isolé de l'adulte en ambulatoire. Recommandations pour la pratique clinique*. France: HAS, 2002. [http://www.has-sante.fr/portail/upload/docs/application/pdf/rpc\\_depression\\_2002\\_-\\_mel\\_2006\\_-\\_recommandations\\_2006\\_12\\_27\\_16\\_20\\_34\\_967.pdf](http://www.has-sante.fr/portail/upload/docs/application/pdf/rpc_depression_2002_-_mel_2006_-_recommandations_2006_12_27_16_20_34_967.pdf) (accessed on 31 August 2016).
  27. HAS (Haute Autorité de Santé). *Prévention, diagnostic et traitement de l'ostéoporose*. France: HAS, 2006. [http://www.has-sante.fr/portail/upload/docs/application/pdf/osteoporose\\_synthese.pdf](http://www.has-sante.fr/portail/upload/docs/application/pdf/osteoporose_synthese.pdf) (accessed on 31 August 2016).
  28. État des lieux et recommandations pour le dépistage du cancer du col de l'utérus en France. *Recommandations en santé publique*. France: HAS, 2010. <http://www.has-sante.fr/portail/upload/docs/application/pdf/2010> (accessed on 31 August 2016).
  29. *Projet de grossesse: informations, messages de prévention, examens à proposer. Document d'information pour les professionnels*. France: HAS, 2009. [http://www.has-sante.fr/portail/upload/docs/application/pdf/2010-01/projet\\_de\\_grossesse\\_informations\\_messages\\_de\\_prevention\\_examens\\_a\\_proposer\\_-\\_fiche\\_de\\_synthese.pdf](http://www.has-sante.fr/portail/upload/docs/application/pdf/2010-01/projet_de_grossesse_informations_messages_de_prevention_examens_a_proposer_-_fiche_de_synthese.pdf).
  30. HAS (Haute Autorité de Santé). *Place des tests immunologiques de recherche de sang occulte dans les selles (iFOBT) dans le programme de dépistage organisé du cancer colorectal en France*. France: HAS, 2008. [http://www.has-sante.fr/portail/upload/docs/application/pdf/2008-12/synthese\\_-\\_place\\_des\\_tests\\_immunologiques\\_de\\_recherche\\_de\\_sang\\_occulte\\_dans\\_les\\_selles\\_ifobt.pdf](http://www.has-sante.fr/portail/upload/docs/application/pdf/2008-12/synthese_-_place_des_tests_immunologiques_de_recherche_de_sang_occulte_dans_les_selles_ifobt.pdf) (accessed on 31 August 2016).
  31. Dépistage du cancer du sein par mammographie dans la population générale. France: ANAES, 1999 <http://www.has-sante.fr/portail/upload/docs/application/pdf/mamo.pdf> (accessed on 31 August 2016).
  32. Mignon MC, Greffrier D, Avremont C, *et al.*; *Prise en charge de l'incontinence urinaire de la femme en médecine générale. Recommandations pour la pratique clinique*. France: HAS, 2003. [http://www.has-sante.fr/portail/upload/docs/application/pdf/argumentaire1\\_2006\\_12\\_01\\_10\\_19\\_53\\_157.pdf](http://www.has-sante.fr/portail/upload/docs/application/pdf/argumentaire1_2006_12_01_10_19_53_157.pdf) (accessed on 31 August 2016).
  33. Final Recommendation Statement: Healthful Diet and Physical Activity for Cardiovascular Disease Prevention in Adults With Cardiovascular Risk Factors: Behavioral Counseling—US Preventive Services Task Force. 2014. <http://www.uspreventiveservicestaskforce.org/Page/Document/RecommendationStatementFinal/healthy-diet-and-physical-activity-counseling-adults-with-high-risk-of-cvd> (accessed on 31 August 2016).
  34. Piper MA, Evans CV, Burda BU, *et al.* Screening for High Blood Pressure in Adults: A Systematic Evidence Review for the U.S. Preventive Services Task Force [Internet]. Rockville (MD): Agency for Healthcare Research and Quality (US); 2014 [cited 2016 Jul 4]. (U.S. Preventive Services Task Force Evidence Syntheses, formerly Systematic Evidence Reviews). <http://www.ncbi.nlm.nih.gov/books/NBK269495/>.
  35. Helfand M, Carson S. *Screening for Lipid Disorders in Adults: Selective Update of 2001 U.S. Preventive Services Task Force Review. Evidence Synthesis No. 49*. Rockville, MD: Agency for Healthcare Research and Quality. AHRQ Publication no. 08-05114-EF-1, 2008. <http://www.ahrq.gov/downloads/pub/prevent/pdfser/lipides.pdf>.
  36. U.S. Preventive Services Task Force. Screening for type 2 diabetes mellitus in adults: U.S. Preventive Services Task Force recommendation statement. *Ann Intern Med*. 2008; 148: 846–54.
  37. Royal Australian College. *Guidelines for Preventive Activities in General Practice*, 8th edn. East Melbourne: Royal Australian College of General Practitioners, 2012. <http://www.nmml.org.au/content/Document/RACGP%20Red%20Book.pdf> (accessed on 21 August 2016).
  38. Anderson P, Gual A, Colom J. *Alcohol and Primary Health Care: Clinical Guidelines on Identification and Brief Interventions*. Barcelona: Department of Health of the Government of Catalonia, 2005.
  39. Moyer VA; Preventive Services Task Force. Screening and behavioral counseling interventions in primary care to reduce alcohol misuse: U.S. preventive services task force recommendation statement. *Ann Intern Med* 2013; 159: 210–8.
  40. US Preventive task force. Final Recommendation Statement: Tobacco Use in Adults and Pregnant Women: Counseling and Interventions—US Preventive Services Task Force. <http://www.uspreventiveservicestaskforce.org/Page/Document/RecommendationStatementFinal/tobacco-use-in-adults-and-pregnant-women-counseling-and-interventions> (accessed on 21 August 2016).
  41. Moyer VA; U.S. Preventive Services Task Force. Screening for HIV: U.S. Preventive Services Task Force Recommendation Statement. *Ann Intern Med* 2013; 159: 51–60.
  42. Moyer VA; U.S. Preventive Services Task Force. Screening for hepatitis C virus infection in adults: U.S. Preventive Services Task Force recommendation statement. *Ann Intern Med* 2013; 159: 349–57.
  43. Final Evidence Review: Syphilis Infection: Screening. U.S. Preventive Services Task Force. <http://www.uspreventiveservicestaskforce.org/Page/Document/EvidenceReportFinal/syphilis-infection-screening> (accessed on February 2014).
  44. Final Recommendation Statement: Depression in Adults: Screening. U.S. Preventive Services Task Force. <http://www.uspreventiveservicestaskforce.org/Page/Document/RecommendationStatementFinal/depression-in-adults-screening1> (accessed on December 2014).
  45. Final Recommendation Statement: Osteoporosis: Screening. *U.S. Preventive Services Task Force*. <http://www.uspreventiveservicestaskforce.org/Page/Document/RecommendationStatementFinal/osteoporosis-screening> (accessed on October 2014).
  46. Moyer VA; U.S. Preventive Services Task Force. Screening for cervical cancer: U.S. Preventive Services Task Force recommendation statement. *Ann Intern Med*. 2012; 156: 880–91.
  47. Final Recommendation Statement: Gestational Diabetes Mellitus, Screening. U.S. Preventive Services Task Force. <http://www.uspreventiveservicestaskforce.org/Page/Document/RecommendationStatementFinal/gestational-diabetes-mellitus-screening> (accessed on January 2014).
  48. Final Recommendation Statement: Folic Acid to Prevent Neural Tube Defects: Preventive Medication. U.S. Preventive Services Task Force. <http://www.uspreventiveservicestaskforce.org/Page/Document/RecommendationStatementFinal/folic-acid-to-prevent-neural-tube-defects-preventive-medication> (accessed on February 2014).
  49. Final Recommendation Statement: Colorectal Cancer: Screening. U.S. Preventive Services Task Force. <http://www.uspreventiveservicestaskforce.org/Page/Document/RecommendationStatementFinal/colorectal-cancer-screening> (accessed on October 2014).
  50. Final Recommendation Statement: Breast Cancer: Screening. U.S. Preventive Services Task Force. <http://www.uspreventiveservicestaskforce.org>

- [Page/Document/RecommendationStatementFinal/breast-cancer-screening](#) (accessed on October 2014).
51. Ornstein SM, Jenkins RG, Litvin CB, Wessell AM, Nietert PJ. Preventive services delivery in patients with chronic illnesses: parallel opportunities rather than competing obligations. *Ann Fam Med* 2013; 11: 344–9.
  52. OCDE. Panorama de la santé. <http://www.oecd.org/fr/sante/systemes-sante/49105873.pdf> (accessed on 2011).
  53. Breuil-Genier P, Goffette C. La durée des séances des médecins généralistes. <http://drees.social-sante.gouv.fr/IMG/pdf/er481.pdf> (accessed on 31 August 2016).
  54. McAvoy BR, Kaner EF, Lock CA, Heather N, Gilvarry E. Our Healthier Nation: are general practitioners willing and able to deliver? A survey of attitudes to and involvement in health promotion and lifestyle counselling. *Br J Gen Pract J R Coll Gen Pract* 1999; 49: 187–90.
  55. Gelly J, Le Bel J, Aubin-Auger I *et al.*; ECOGEN study group. Profile of French general practitioners providing opportunistic primary preventive care—an observational cross-sectional multicentre study. *Fam Pract* 2014; 31: 445–52.
  56. Coffield AB, Maciosek MV, McGinnis JM *et al.* Priorities among recommended clinical preventive services. *Am J Prev Med* 2001; 21: 1–9.
  57. Fielding JE, Husten CG, Richland JH. Does preventive care save money? *N Engl J Med* 2008; 358: 2847–8; author reply 2847–8.
  58. Crabtree BF, Miller WL, Tallia AF *et al.* Delivery of clinical preventive services in family medicine offices. *Ann Fam Med* 2005; 3: 430–5.
  59. Hofer TP, Zemencuk JK, Hayward RA. When there is too much to do: how practicing physicians prioritize among recommended interventions. *J Gen Intern Med* 2004; 19: 646–53.
  60. Pollak KI, Krause KM, Yarnall KS, *et al.* Estimated time spent on preventive services by primary care physicians. *BMC Health Serv Res* 2008; 8: 245.
  61. Nemeth LS, Ornstein SM, Jenkins RG, Wessell AM, Nietert PJ. Implementing and evaluating electronic standing orders in primary care practice: a PPRNet study. *J Am Board Fam Med* 2012; 25: 594–604.
  62. Melnikow J, Kohatsu ND, Chan BK. Put prevention into practice: a controlled evaluation. *Am J Public Health* 2000; 90: 1622–5.
  63. Walter U, Flick U, Neuber A, *et al.* Putting prevention into practice: qualitative study of factors that inhibit and promote preventive care by general practitioners, with a focus on elderly patients. *BMC Fam Pract* 2010; 11: 68.
  64. Cherrington A, Corbie-Smith G, Pathman DE. Do adults who believe in periodic health examinations receive more clinical preventive services? *Prev Med* 2007; 45: 282–9.
  65. Mirand AL, Beehler GP, Kuo CL, Mahoney MC. Physician perceptions of primary prevention: qualitative base for the conceptual shaping of a practice intervention tool. *BMC Public Health* 2002; 2: 16.
  66. Boulware LE, Marinopoulos S, Phillips KA *et al.* Systematic review: the value of the periodic health evaluation. *Ann Intern Med* 2007; 146: 289–300.
  67. Shires DA, Stange KC, Divine G *et al.* Prioritization of evidence-based preventive health services during periodic health examinations. *Am J Prev Med* 2012; 42: 164–73.
  68. Krogsbøll LT, Jørgensen KJ, Grønhoj Larsen C, Gøtzsche PC. General health checks in adults for reducing morbidity and mortality from disease: cochrane systematic review and meta-analysis. *BMJ* 2012; 345: e7191.
  69. Howard-Tripp M. Should we abandon the periodic health examination?: YES. *Can Fam Physician* 2011; 57: 158–60.
